# Supplementary material
Source: publisher site journal article supplement (https://www.dovepress.com/article/452424)
Supplement: Supplementary file 1 [file get_supplementary_file.php]

Supplementary Materials for

**Lymphocyte-to-C reactive protein ratio is an independent predictor of survival benefits for**

**hepatocellular carcinoma patients receiving radiotherapy**

Zhan Shi1#, Sihui Zhu2#, Yuncheng Jin1, Liang Qi1, Mingzhen Zhou1, Ziyan Zhou1, Juan Zhang1, Baorui Liu1*, Jie Shen1*

Corresponding authors: Jie Shen, shenjie2008nju@163.com; Baorui Liu, baoruiliu@nju.edu.cn.

**This Word file includes:**

Supplementary Figure 1 to 5.

Supplementary Table 1 and 2.


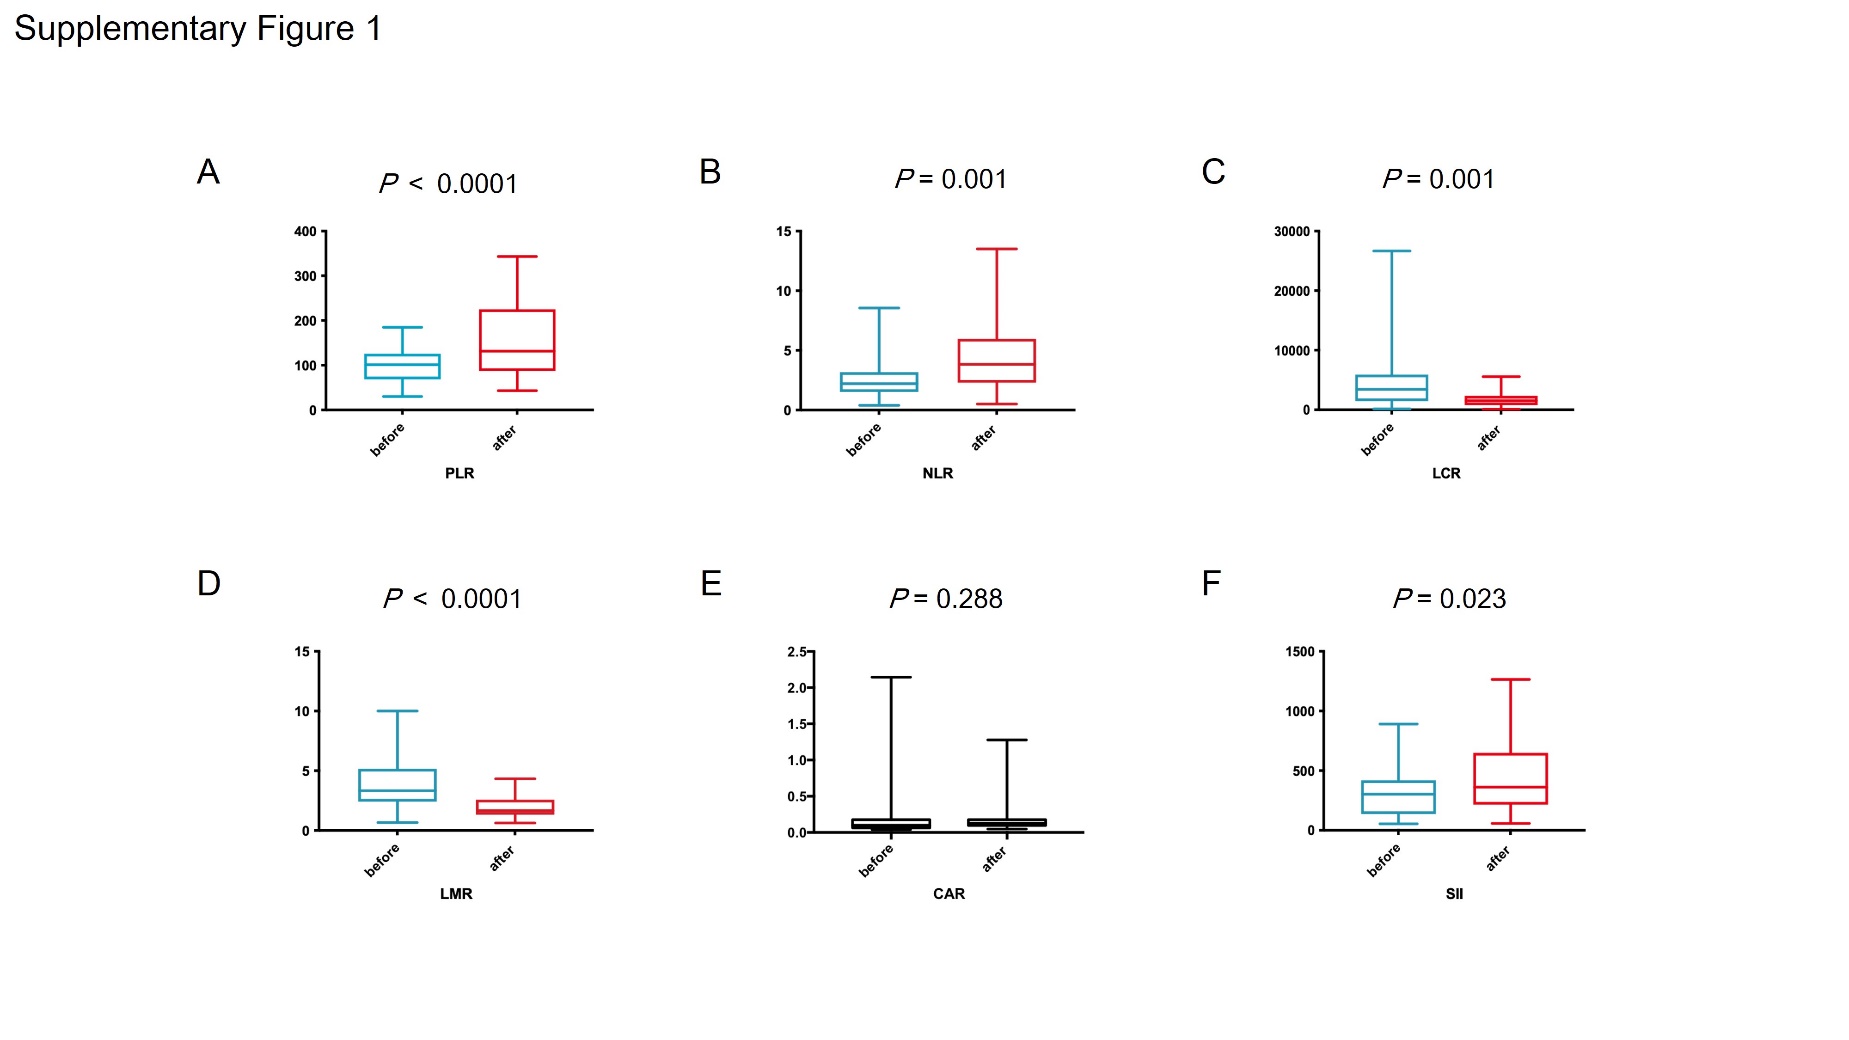


**Supplementary Fig. 1. Boxplot of pre- and post-radiotherapy PLR (A), NLR (B), LCR (C), LMR (D), CAR (E) and SII (F) for primary liver lesions.** **Abbreviations:** PLR, platelet-to-lymphocyte ratio; NLR, neutrophil-to-lymphocyte ratio; LCR, lymphocyte‐to-C reactive protein ratio; LMR, lymphocyte-to-monocyte ratio; CAR, C-reactive protein-to-albumin ratio; SII, systemic immune-inflammation index.


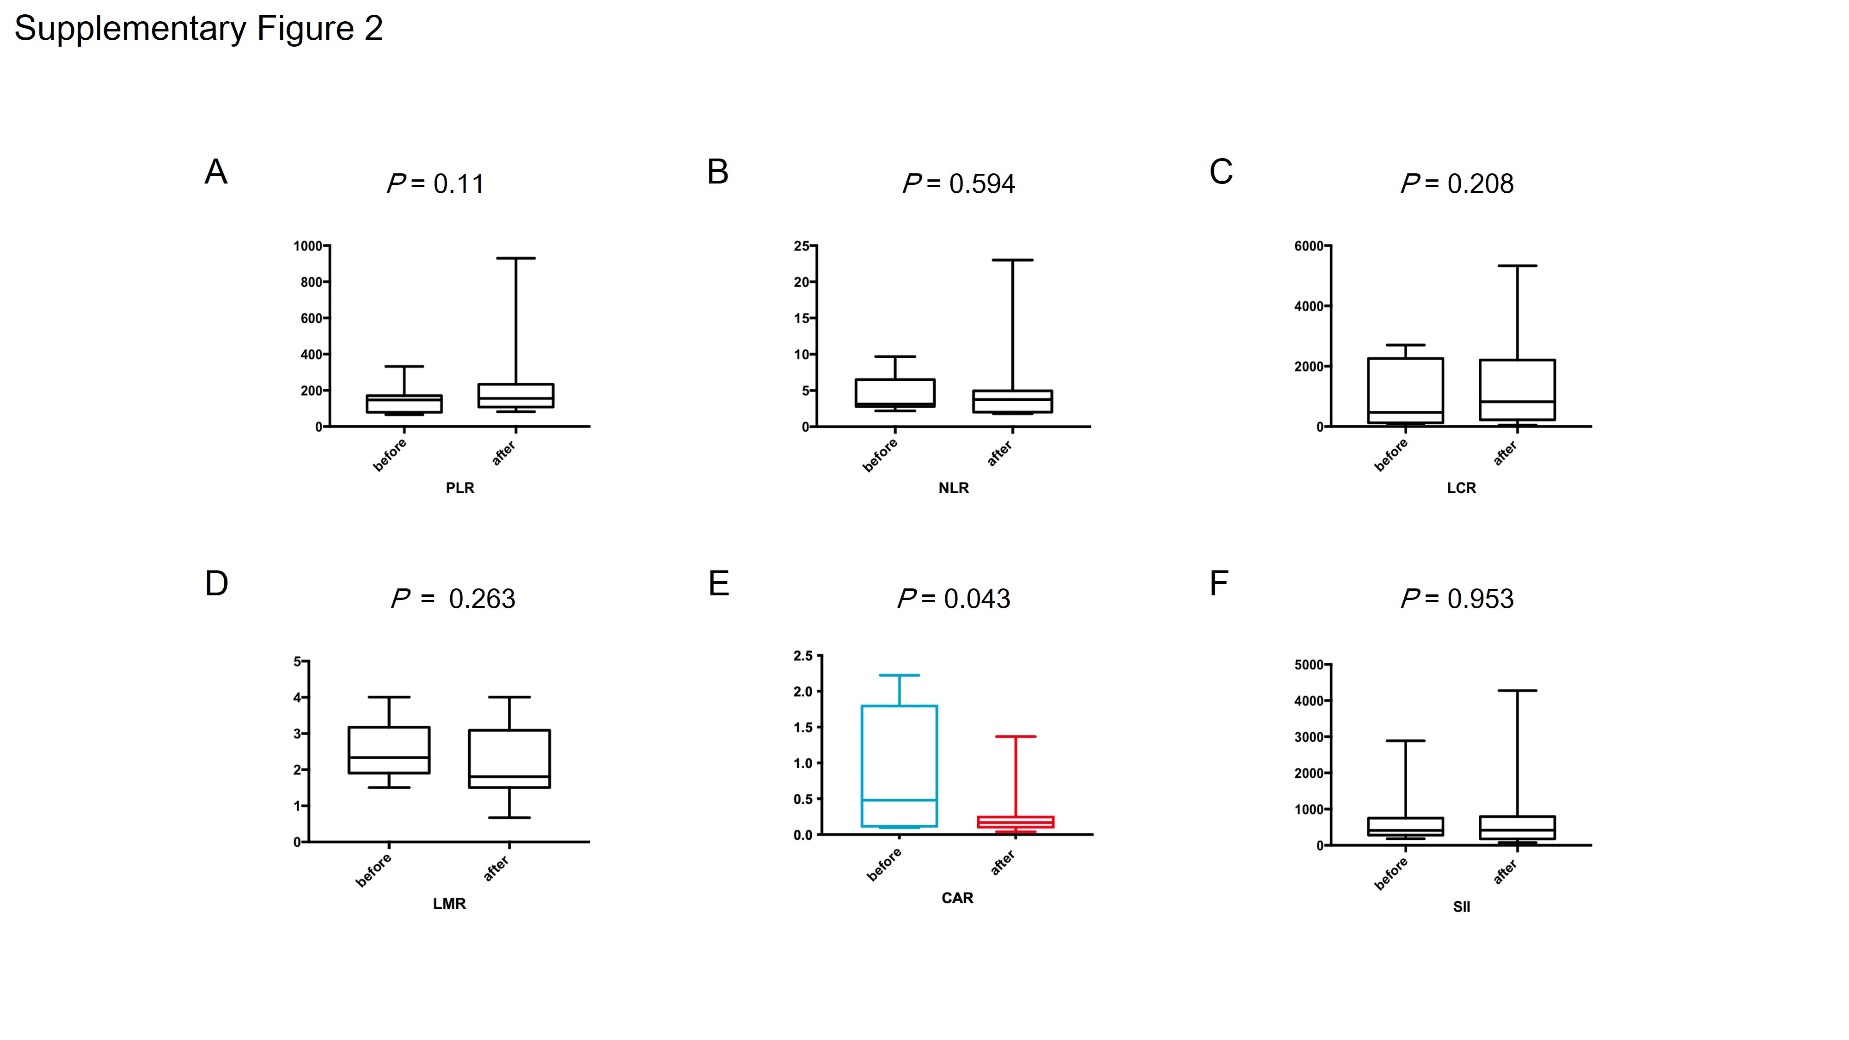


**Supplementary Fig. 2. Boxplot of pre- and post-radiotherapy PLR (A), NLR (B), LCR (C), LMR (D), CAR (E) and SII (F) for metastatic bone lesions. Abbreviations:** PLR, platelet-to-lymphocyte ratio; NLR, neutrophil-to-lymphocyte ratio; LCR, lymphocyte‐to-C reactive protein ratio; LMR, lymphocyte-to-monocyte ratio; CAR, C-reactive protein-to-albumin ratio; SII, systemic immune-inflammation index.


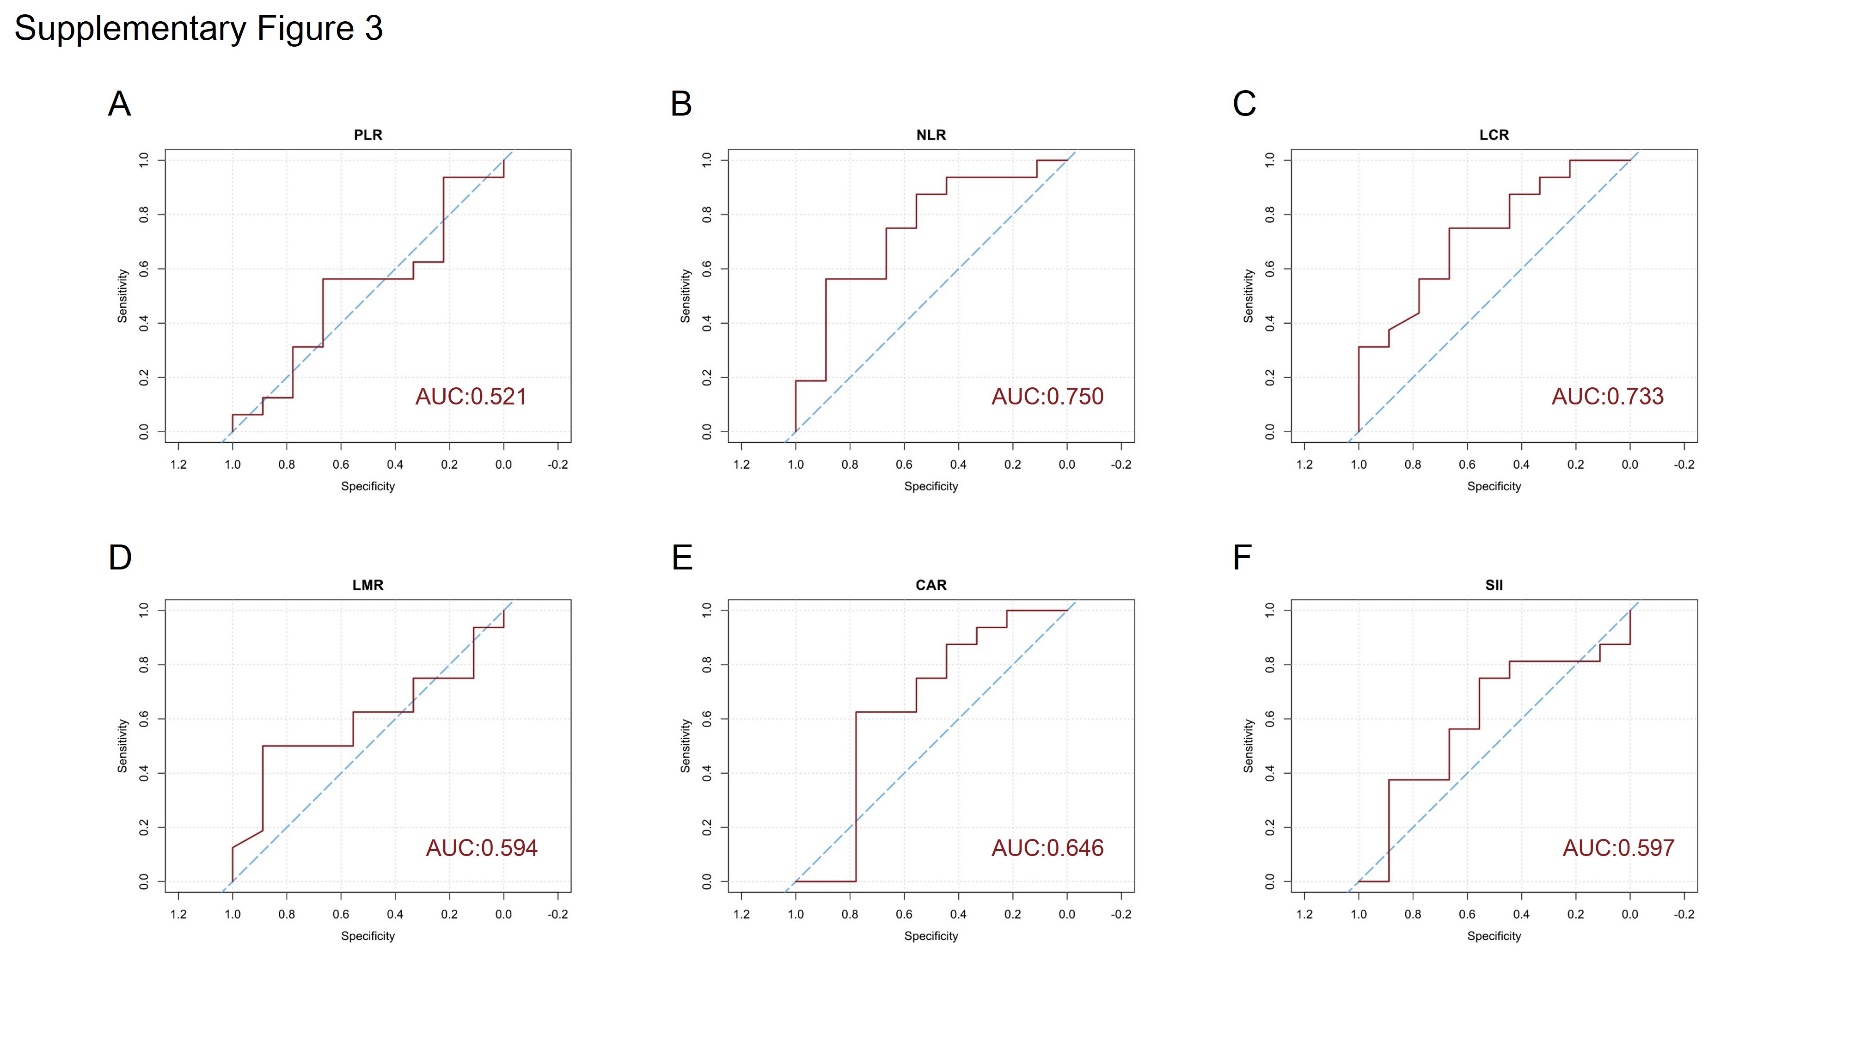


**Supplementary Fig. 3. ROC results for 1-year OS of PLR (A), NLR (B), LCR (C), LMR (D), CAR (E) and SII (F). Abbreviations:** ROC, receiver operating characteristic; AUC, area under the curve; OS, overall survival; PLR, platelet-to-lymphocyte ratio; NLR, neutrophil-to-lymphocyte ratio; LCR, lymphocyte‐to-C reactive protein ratio; LMR, lymphocyte-to-monocyte ratio; CAR, C-reactive protein-to-albumin ratio; SII, systemic immune-inflammation index.


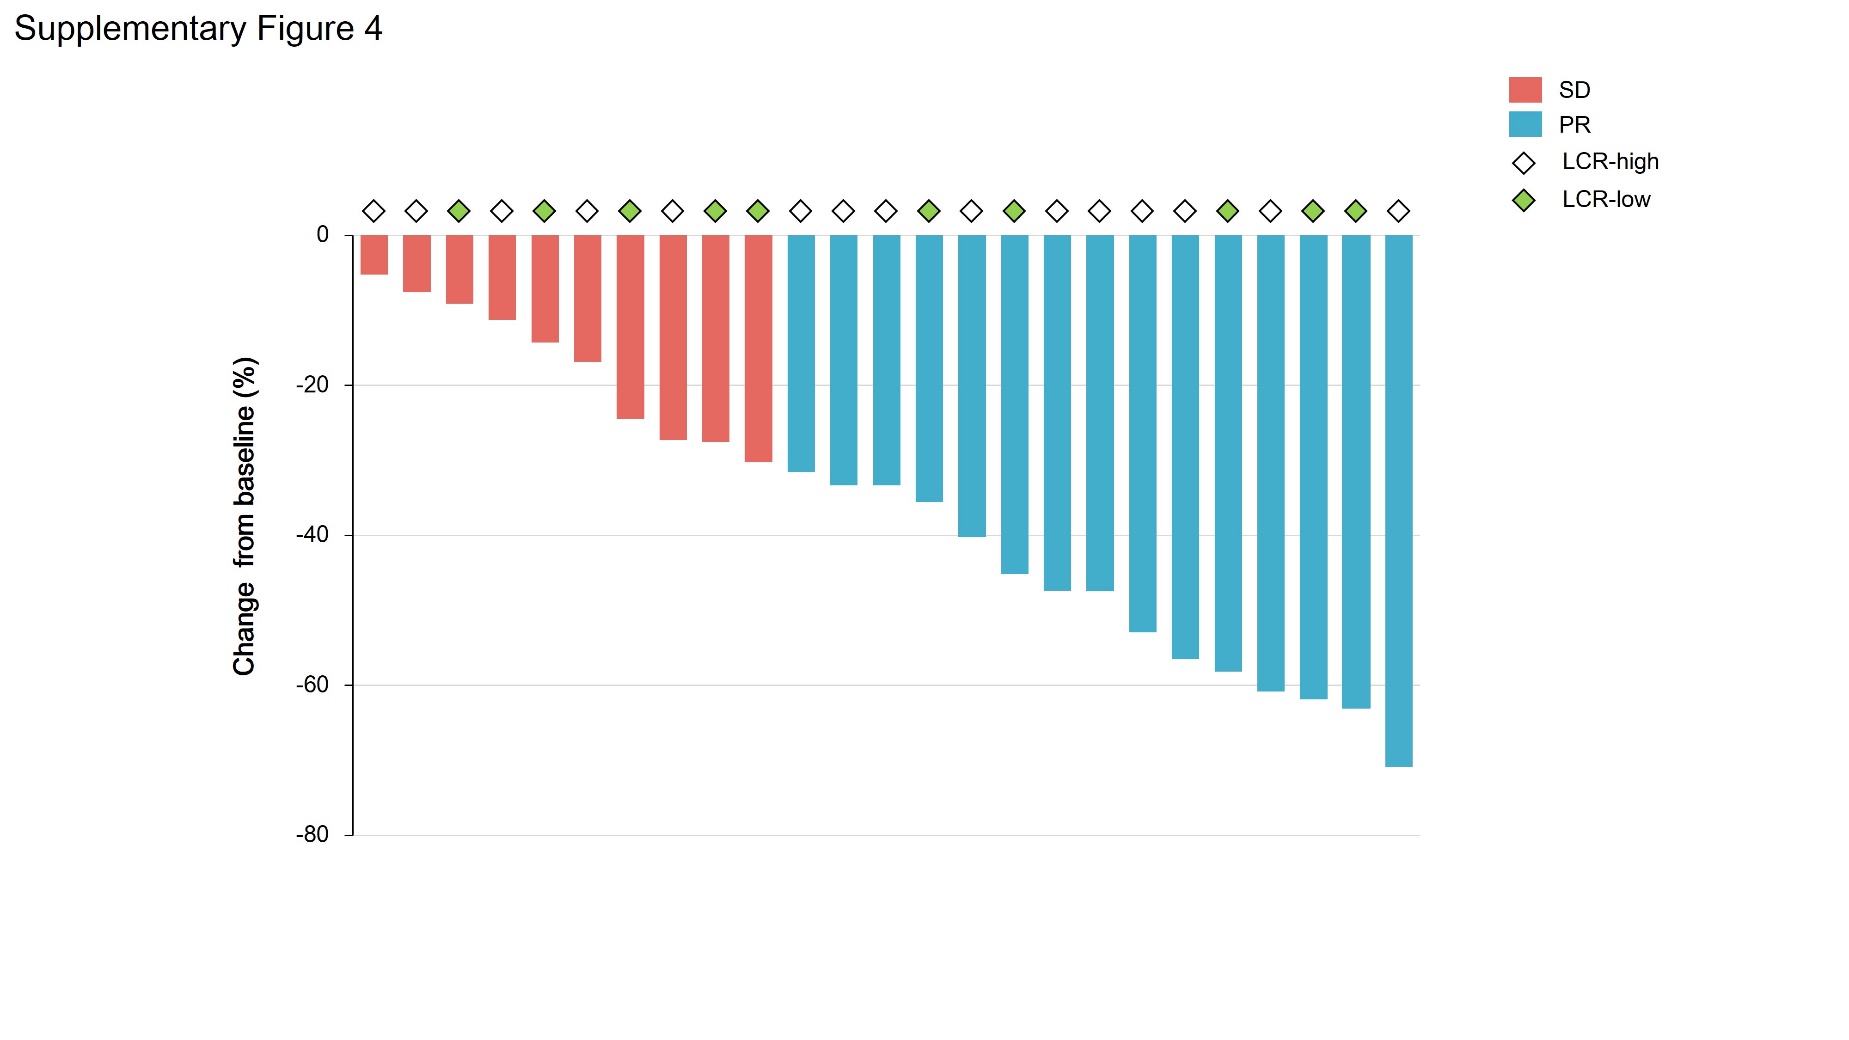


**Supplementary Fig. 4. Best percentage change in tumor size from baseline of target lesions.** **Abbreviations:** SD, stable disease; PR, partial response; LCR, lymphocyte‐to-C reactive protein ratio.


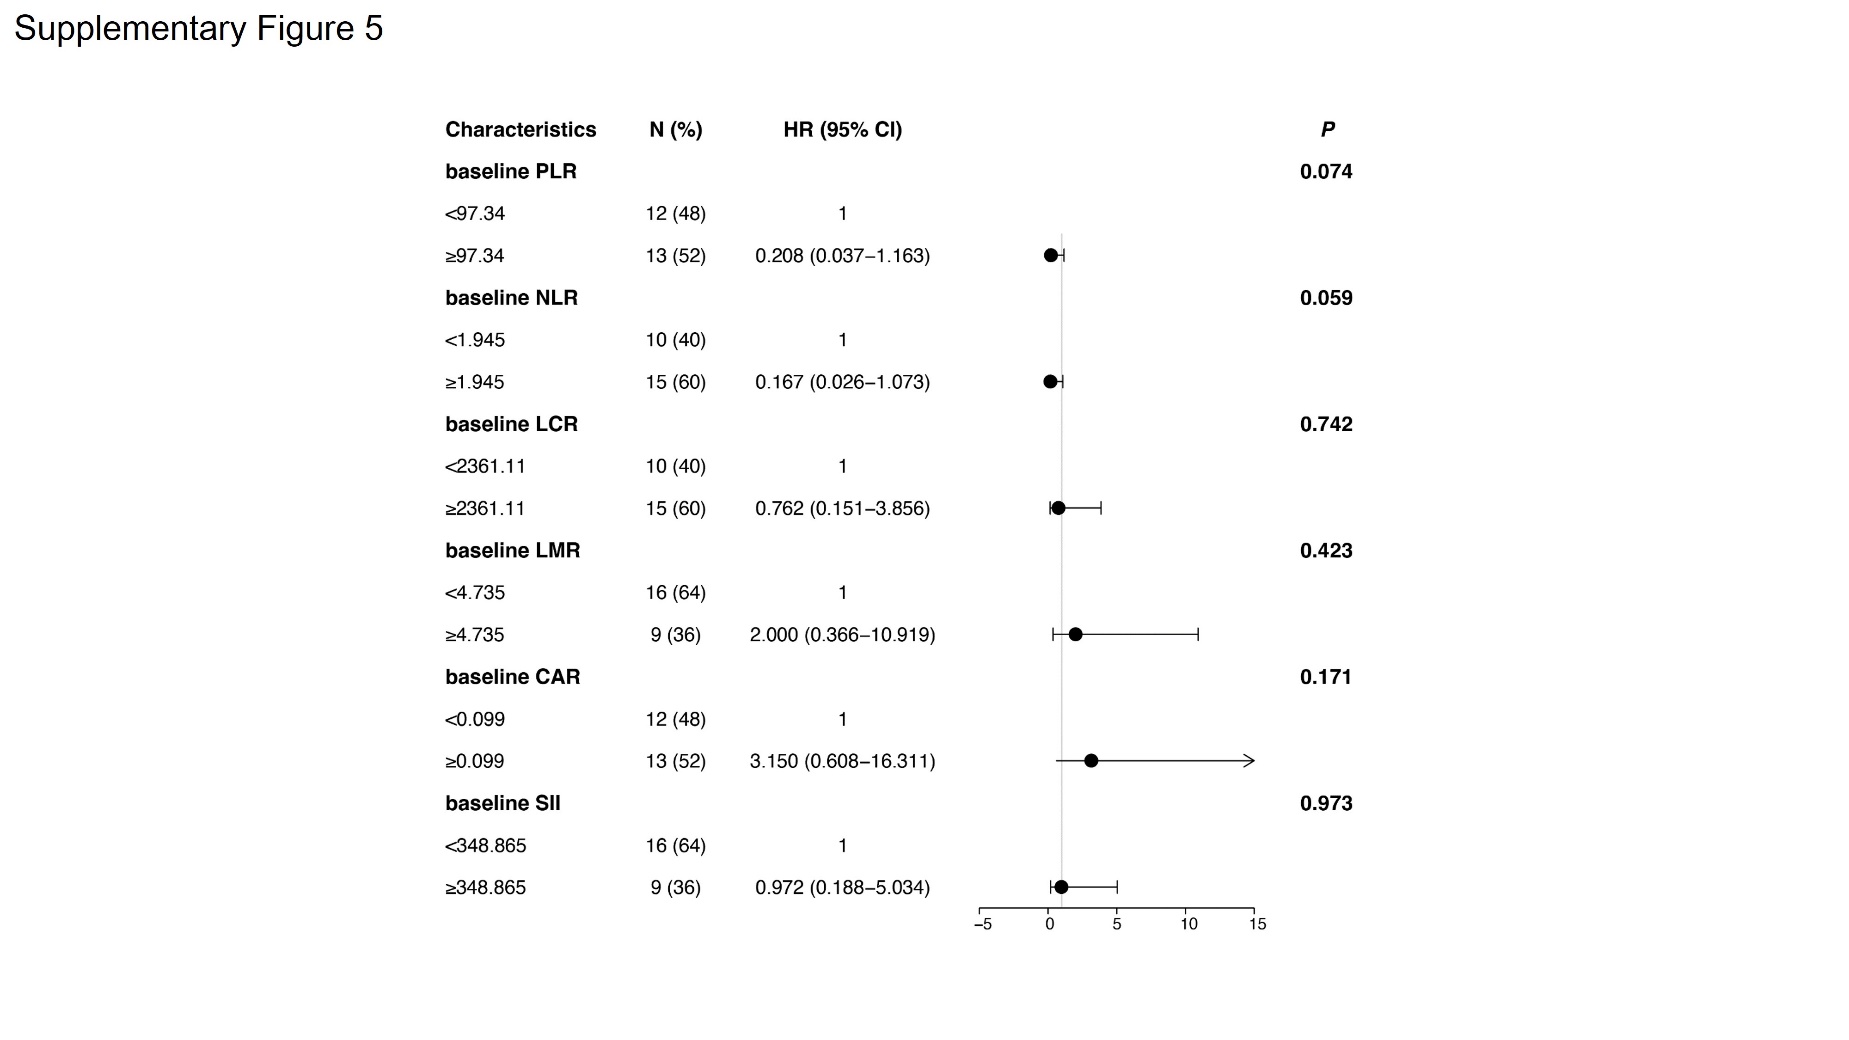


**Supplementary Fig. 5. Forest plot for liver toxicity assessed by inflammatory markers.** **Abbreviations:** HR, hazard ratio; CI, confidence interval; PLR, platelet-to-lymphocyte ratio; NLR, neutrophil-to-lymphocyte ratio; LCR, lymphocyte‐to-C reactive protein ratio; LMR, lymphocyte-to-monocyte ratio; CAR, C-reactive protein-to-albumin ratio; SII, systemic immune-inflammation index.

**Supplementary Table 1. Tumor response after radiotherapy**

| **Response** | **Total,**  **N (%)** | **PLR** | | ***P*** | **NLR** | | ***P*** | **LCR** | | ***P*** | **LMR** | | ***P*** | **CAR** | | ***P*** | **SII** | | ***P*** |
| --- | --- | --- | --- | --- | --- | --- | --- | --- | --- | --- | --- | --- | --- | --- | --- | --- | --- | --- | --- |
| **Low** | **High** |  | **Low** | **High** |  | **Low** | **High** |  | **Low** | **High** |  | **Low** | **High** |  | **Low** | **High** |  |
| CR | 0 | 0 | 0 |  | 0 | 0 |  | 0 | 0 |  | 0 | 0 |  | 0 | 0 |  | 0 | 0 |  |
| PR | 15 | 6 | 9 |  | 6 | 9 |  | 5 | 10 |  | 9 | 6 |  | 8 | 7 |  | 10 | 5 |  |
| SD | 10 | 6 | 4 |  | 4 | 6 |  | 5 | 5 |  | 7 | 3 |  | 4 | 6 |  | 6 | 4 |  |
| PD | 0 | 0 | 0 |  | 0 | 0 |  | 0 | 0 |  | 0 | 0 |  | 0 | 0 |  | 0 | 0 |  |
| ORR | 15 (60.0) | 6 (50.0) | 9 (69.2) | 0.428 | 6 (60.0) | 9 (60.0) | 1.000 | 5 (50.0) | 10 (66.7) | 0.442 | 9 (56.3) | 6 (66.7) | 0.691 | 8 (66.7) | 7 (53.8) | 0.688 | 10 (62.5) | 5 (55.6) | 1.000 |
| DCR | 25 (100) | 12 (100) | 13 (100) |  | 10 (100) | 15 (100) |  | 10 (100) | 15 (100) |  | 16 (100) | 9 (100) |  | 12 (100) | 13 (100) |  | 16 (100) | 9 (100) |  |

**Abbreviations:** CR, complete response; PR, partial response; SD, stable disease; PD, progressive disease; ORR, objective response rate; DCR, disease control rate; PLR, platelet-to-lymphocyte ratio; NLR, neutrophil-to-lymphocyte ratio; LCR, lymphocyte-to-C reactive protein ratio; LMR, lymphocyte-to-monocyte ratio; CAR, C-reactive protein-to-albumin ratio; SII, systemic immune-inflammation index.

**Supplementary Table 2. Liver toxicity within 3 months after radiotherapy**

| Toxicity | Grade | | | |
| --- | --- | --- | --- | --- |
| **0** | **1** | **2** | **≥3** |
| **Cases (%)** | **Cases (%)** | **Cases (%)** | **Cases (%)** |
| Elevated ALT | 16 (64.0) | 9 (36.0) | 0 (0) | 0 (0) |
| Elevated AST | 16 (64.0) | 9 (36.0) | 0 (0) | 0 (0) |
| Hyperbilirubinemia | 23 (92.0) | 2 (8.0) | 0 (0) | 0 (0) |
| Elevated GGT | 4 (16.0) | 7 (28.0) | 11 (44.0) | 3 (12.0) |
| Hypoalbuminemia | 14 (56.0) | 11 (44.0) | 0 (0) | 0 (0) |
| Elevated ALP | 25 (100) | 0 (0) | 0 (0) | 0 (0) |
| Prolonged APTT | 20 (100) | 5 (20.0) | 0 (0) | 0 (0) |
| Elevated INR | 25 (100) | 0 (0) | 0 (0) | 0 (0) |

**Abbreviations:** ALT, alanine aminotransferase; AST, aspartate aminotransferase; ALP, alkaline phosphatase; GGT, gamma-glutamyl transferase; APTT, activated partial thromboplastin time; INR, international normalized ratio.
